# Supplementary material for: High level of αB-crystallin contributes to the progression of osteosarcoma
Source: PubMed Central journal article supplement (PMC4891021; doi:10.18632/oncotarget.6928), 2016-01-17
Supplement: oncotarget-07-9007-s001.pdf [file oncotarget-07-9007-s001.pdf]

## High level of $\alpha$ B-crystallin contributes to the progression of osteosarcoma

### Supplementary Material

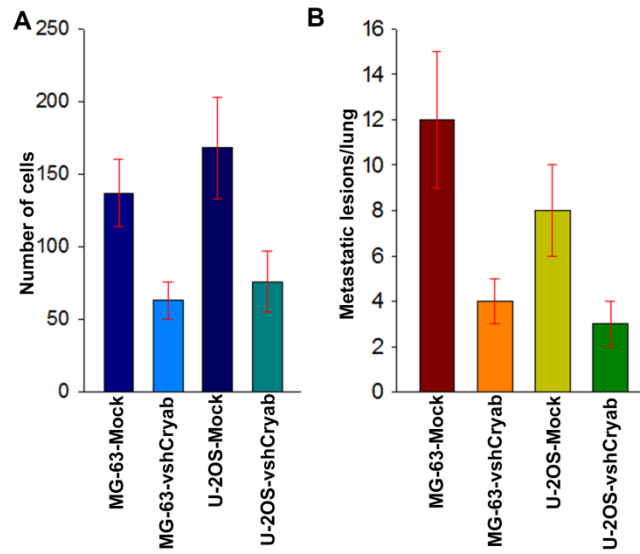

**Supplemental Figure 1:** **A.** The histogram of invasive cells, **B.** the histogram of metastatic lesions.

**Table S1. The primary antibodies for western blot, IHC and IF**

| Antibody                         | Concentration for<br>WB | Concentration for<br>IHC | Concentration for<br>IF | Concentration<br>for co-IP | Specificity                        | Company                                              |
|----------------------------------|-------------------------|--------------------------|-------------------------|----------------------------|------------------------------------|------------------------------------------------------|
| Cryab                            | 1:3000                  | 1:200                    | 1:100                   | 1:1000                     | Rat polyclonal                     | Novus<br>Biologicals                                 |
| <u><math>\beta</math>-action</u> | <u>1:1000</u>           | /                        | /                       | /                          | <u>Rabbit</u><br><u>polyclonal</u> | <u>Cell</u><br><u>Signaling</u><br><u>Technology</u> |
| AKT                              | 1:1000                  | /                        | /                       | /                          | Rabbit<br>polyclonal               | Cell<br>Signaling<br>Technology                      |
| <i>p</i> -AKT <sup>s473</sup>    | 1:1000                  | /                        | 1:100                   | /                          | Rabbit<br>polyclonal               | Cell<br>Signaling<br>Technology                      |
| ERK1/2                           | 1:1000                  | /                        | /                       | /                          | Rabbit<br>polyclonal               | Cell<br>Signaling<br>Technology                      |
| <i>p</i> -ERK1/2                 | 1:1000                  | /                        | /                       | /                          | Rabbit<br>polyclonal               | Cell<br>Signaling<br>Technology                      |
| p38                              | 1:1000                  | /                        | /                       | /                          | Rabbit<br>polyclonal               | Cell<br>Signaling<br>Technology                      |
